# Supplementary material
Source: PubMed Central journal article supplement (PMC4812878)
Supplement: 10-1055-s-0034-1382874-sup_gf821.pdf [file 10-1055-s-0034-1382874-sup_gf821.pdf]

# S1-Leitlinie Anwendung des CTG während Schwangerschaft und Geburt

Langfassung – AWMF-Register-Nr. 015/036

S1-Guideline on the Use of CTG During Pregnancy and Labor

Long version – AWMF Registry No. 015/036

## Autoren

Deutsche Gesellschaft für Gynäkologie und Geburtshilfe (DGGG),  
Arbeitsgemeinschaft Materno-fetale Medizin (AGMFM),  
Deutsche Gesellschaft für Pränatal und Geburtsmedizin (DGPGM),  
Deutsche Gesellschaft für Perinatale Medizin (DGPM)

## 1 Hintergrund

### 1.1 Ziel, Zielgruppe und Methode

Ziel dieses Konsensuspapiers ist es, die Anwendung des Kardiotokogramms (CTG) zur Überwachung des ungeborenen Kindes auf der Basis evidenzbasierter Methoden zu standardisieren. Dies erfolgt unter Berücksichtigung von Stör- und Einflussgrößen auf das CTG, unter Verwendung einheitlicher Definitionen und objektiver Bewertungsmöglichkeiten sowie durch Hinweise auf vorgeschaltete Diagnostik- und additive Überwachungsverfahren.

Zielgruppe dieses Konsensuspapiers sind alle Berufsgruppen, die mit Hilfe einer CTG-Registrierung Schwangerschaft und Geburt überwachen, v. a. Frauenärzte und Hebammen.

Methode: Die Erstellung dieser Leitlinie erfolgte unter besonderer Berücksichtigung der bisherigen Empfehlungen [85], der FIGO-Richtlinien [59,82], der Richtlinien des Royal College of Obstetricians and Gynaecologists [84], der NICHD [72], der Society of Obstetrics and Gynecologists Canada [110] und des American College of Obstetricians and Gynaecologists [4,5] sowie – soweit vorliegend – evidenzbasierter Daten.

Grundlage dieser Leitlinie ist die bestverfügbare „Evidenz“, die von den Mitgliedern der Konsensusgruppe sorgfältig zusammengetragen und klassifiziert wurde.

Nicht in jedem Falle konnten die Empfehlungen direkt aus dem Evidenzgrad der vorliegenden Literatur abgeleitet werden. Die Empfehlungen sind Ausdruck allgemein anerkannter guter klinischer Praxis, die seitens der am Konsensusprozess dieser Leitlinie Beteiligten nicht infrage gestellt wird.

Im Hinblick auf die im Verlauf der Fertigstellung dieser Leitlinie gemachten Vorgaben der AWMF für eine einheitliche Struktur der unterschiedlichen Leitlinientypen (S1, S2e, S2k, S3) werden in dieser S1-Handlungsempfehlung die Empfehlungsgrade nicht explizit angeben, sondern sprachlich durch „soll“, „sollte“ und „kann“ ausgedrückt. Im Hintergrundtext werden aus Gründen der Transparenz die Evidenzgrade der zitierten Studien angegeben.

Der Grad der Evidenz ist wie folgt angegeben (● **Tab. 1**):

**Tab. 1** Evidenzlevel (EL) (nach [84]).\*

| Level | Evidenz                                                                                                    |
|-------|------------------------------------------------------------------------------------------------------------|
| Ia    | systematischer Review einer Metaanalyse randomisierter kontrollierter Studien                              |
| Ib    | mindestens eine randomisierte kontrollierte Studie                                                         |
| IIa   | mindestens eine kontrollierte Studie mit gutem Design ohne Randomisierung                                  |
| IIb   | mindestens eine anderweitige Quasi-Experimentaldstudie mit gutem Design                                    |
| III   | nicht experimental beschreibende Studien mit gutem Design wie vergleichende, korrelierende und Fallstudien |
| IV    | Experten-Komitee; Berichte oder Meinungen und/oder klinische Erfahrung respektierter Persönlichkeiten      |

\* Die Ersterstellung der Leitlinie erfolgte im Jahr 2003, publiziert 2004, also noch vor der Entwicklung der DELBI und AWMF – Kriterien zur Evidenzfestlegung. Die Angaben zur Evidenz wurden analog der Bewertung von Guidelines ausländischer Fachgesellschaften (s. oben) vorgenommen und diese Bewertungsform auch in der Überarbeitung beibehalten.

## Bibliografie

**DOI** <http://dx.doi.org/10.1055/s-0034-1382874>  
Geburtsh Frauenheilk 2014; 74:  
1–12 © Georg Thieme  
Verlag KG Stuttgart · New York ·  
ISSN 0016-5751

## Korrespondenzadresse

**Univ.-Prof. Dr. KTM Schneider**  
Abteilung für Geburtshilfe  
und Perinatalmedizin  
Klinikum rechts der Isar  
Technische Universität  
München  
Ismaninger Straße 22  
81675 München  
KTM.Schneider@lrz.tum.de

## DGGG-Leitlinienssekretariat

**Prof. Dr. med. Matthias W. Beckmann,**  
**DGGG-Leitlinienbeauftragter**  
Frauenklinik  
Universitätsklinikum Erlangen  
Universitätsstraße 21–23  
91054 Erlangen  
Tel.: 091 31-85-3 3507/44063  
Fax: 091 31-85-3 3951

## 2 Einführung

### 2.1 Zielsetzung und Problematik der CTG-Registrierung

Ziel der CTG-Registrierung ist die rechtzeitige Erkennung fetaler Gefahrenzustände, um intervenieren zu können, bevor eine Schädigung des Feten eintritt. Dabei steht die Erkennung von Mustern der fetalen Herzfrequenz (FHF) im Vordergrund, die mit einer mangelhaften Sauerstoffversorgung des Feten verknüpft sind.

In aller Regel kann man aus als normal eingestuften FHF-Mustern zuverlässig auf das Wohlbefinden des Feten schließen. In bis zu 50% spiegeln pathologisch eingestufte FHF-Muster physiologische Veränderungen wider und werden damit falsch positiv (falsch pathologisch) bewertet. Daraus ergibt sich sowohl anteilig auch subpartial ein Anstieg der Geburtseinleitungen und der operativen Entbindungsfrequenz.

Die Ursachen liegen meistens in der Nichtbeachtung zahlreicher Stör- und Einflussgrößen (u. a. fetaler Verhaltenszustände, Gestationsalter), der fehlenden Anwendung ergänzender Testverfahren, Interpretationsunsicherheit sowie inkonsistenten Grenzwerten und Auswertungsmodalitäten [15, 23, 26, 37, 61, 68].

### 2.2 Physiologie und Pathophysiologie

Das fetale Herz und der fetale Kreislauf gewährleisten die fetale Versorgung. Unter physiologischen Bedingungen erfolgt die Regulation in diesem System über nervale Beeinflussung des Herzens. Einfluss auf diese Steuerung haben übergeordnete medulläre Zentren, die durch Presso- und Chemorezeptoren sowie lokale Stoffwechselforgänge gesteuert werden. Unter physiologischen Bedingungen kann somit durch eine ständige Anpassung des arteriellen und venösen Blutdrucks, des Herz-Zeit-Volumens und des Gefäßwiderstands ein suffizienter Stoffwechsel aufrechterhalten werden.

Abweichungen von dieser Steady-State-Situation verändern die fetale Herzfrequenz (FHF) mit Akzelerationen, Variabilität, Tachykardie, Dezelerationen und Bradykardie. Die Komplexität der fetalen Antwort auf verschiedene Stör- und Einflussgrößen führt nicht selten zu Fehlinterpretationen der FHF.

### 2.3 Einflussfaktoren

Die FHF unterliegt folgenden Einflussfaktoren (EL IIa) (● **Tab. 2**):

**Tab. 2** Einflussfaktoren auf das fetale CTG (modifiziert nach [44]).

| maternal              | fetoplazentar         | fetal              | exogen      |
|-----------------------|-----------------------|--------------------|-------------|
| körperl. Aktivität    | Gestationsalter       | Bewegungen         | Lärm        |
| Körperhaltung         | NS-Kompression        | Verhaltenszustände | Medikamente |
| Uterusaktivität       | Plazenta-insuffizienz | Weckreize          | Rauchen     |
| Körpertemp. (Fieber)  | Chorio-<br>amnionitis | Hypoxämie          | Drogen      |
| Blutdruckschwankungen |                       |                    |             |

Bei den maternalen Faktoren hat neben dem bekannten Vena-cava-Syndrom auch die aufrechte Körperhaltung Auswirkungen auf die uteroplazentare Perfusion [91]. Die uterine Durchblutung hängt direkt vom arteriellen Mitteldruck der Mutter ab. Insbesondere hohe diastolische Blutdruckwerte vermindern die

uterine Durchblutung. Eine Erhöhung des Uterustonos und/oder Wehentätigkeit führen grundsätzlich zur Gefahr einer Oxygenierungseinschränkung des Feten. Diese frühzeitig zu erkennen, ist vor allem bei Frühgeburten wichtig, um einer Schädigung des Gehirns vorzubeugen.

Ähnliche Musterveränderungen des CTG können auch fetoplazentare Ursachen haben (z. B. Plazentainsuffizienz). Während passagere Nabelschnurkompressionen zumeist saltatorische FHF-Muster zur Folge haben, kann eine relevante Plazentalösung nach einer tachykarden Phase zu einer Bradykardie führen. Eine Chorioamnionitis kann bereits zu einem Anstieg der fetalen basalen Herzfrequenz und gleichzeitig zu einer Abnahme der Variabilität führen, bevor eine Erhöhung der Körpertemperatur der Mutter nachweisbar wird. Besonders bei Frühgeburten sollte die durch Endotoxine ausgelöste, über einen längeren Zeitraum persistierende fetale Tachykardie über eine vorzeitige Entbindung nachdenken lassen, da der enge Zusammenhang zwischen frühkindlicher Hirnschädigung und Chorioamnionitis bekannt ist [32].

Die wichtigsten fetalen Faktoren mit Einfluss auf die Herzfrequenzkurve sind das Gestationsalter und die fetalen Verhaltensmuster („fetal behavioral states“) [20].

Bei Feten ab der 34. Schwangerschaftswoche sind die zyklischen Wechsel der Herzfrequenzmuster und die mit ihnen assoziierten Veränderungen der fetalen Verhaltens- und Bewegungsmuster zwischen Ruhe (Stadium 1F, Dauer 20–30 min) und Aktivität (Stadium 2F, Dauer 20–90 min) die sichersten Zeichen für fetales Wohlbefinden in der Eröffnungs- und frühen Austreibungsperiode. In diesen zwei definierten Aktivitätszuständen verbringen reife Feten etwa 80–90% ihrer Zeit. Die verbleibende Zeit befinden sie sich in ruhigen (Stadium 3F) oder aktiven (Stadium 4F) Wachzuständen. Die meisten Studien zur physiologischen Entwicklung des fetalen Herzfrequenzmusters beziehen sich auf diesen Zeitraum und sind daher erst ab der 34. SSW anwendbar.

Fetale Atembewegungen wurden früher für Indikatoren fetalen Wohlbefindens gehalten, treten aber zu unregelmäßig auf, um als solche verwertbar zu sein. Sie verstärken aber die Kurzzeit-Variabilität als Ausdruck fetaler respiratorischer Arrhythmie. Ein Singultus des Kindes ist ebenfalls in der Herzfrequenzregistrierung erkennbar (spike).

Viele Medikamente überwinden mühelos die Plazentaschranke und erreichen in hoher Konzentration das Gehirn und die Zentren der Kreislaufregulation [24, 45, 62, 78, 100, 101]. Dies gilt besonders für Sedativa, Anästhetika (allgemein und lokal wirksame) und Antiepileptika, die wie Kortikosteroide (Dexamethason und Betamethason) und wie auch Kokainabusus die Herzfrequenz-Variabilität herabsetzen und einen stillen Kurvenverlauf bewirken können. Auch das häufig gebrauchte Magnesiumsulfat kann zu verminderter FHR-Variabilität führen.

Betamimetika (z. B. Fenoterol, Salbutamol), wie sie zur Tokolyse-Therapie eingesetzt werden, werden zwar überwiegend an der Plazentaschranke metabolisiert, sind aber auch in geringen Mengen oder als Metabolite noch wirksam, sodass sie zu einer Steigerung der Herzfrequenz des Feten mit gleichzeitiger Verminderung der Variabilität und der Herzfrequenzakzelerationen führen können. Derartige CTG-Muster sind meist nach spätestens 5–7 Tagen reversibel und stellen keine konkrete fetale Bedrohung dar. Antihypertonika wie die Betarezeptorenblocker passieren im Verhältnis 1 : 1 die Plazentaschranke und können dosisabhängig eine komplette Blockade des sympathischen Nervensystems des Feten verursachen. Dies führt u. U. zur Abflachung von Akzelerationen, zu ausgeprägten Bradykardien oder auch zu Tachy-

kardien. Darüber hinaus kann die Betablockade die für den Fall eines Sauerstoffmangels erforderliche fetale Kreislaufzentralisation und Glukosemobilisation beeinträchtigen.

Akustische Faktoren (Reize) beeinflussen das FHF-Muster ebenfalls und können diagnostisch genutzt werden (siehe auch 6.1.4).

### 3 Methodik

#### 3.1 Signalgewinnung

Am häufigsten findet das Dopplerultraschallverfahren zur Ableitung der fetalen Herzfrequenz (Kardiogramm) Verwendung. Durch Parallelableitung bzw. manuelle Erfassung muss zumindest initial eine Verwechslung mit der mütterlichen Herzfrequenz ausgeschlossen werden. Gepulste Ultraschallsignale werden von einem am Abdomen der Mutter platzierten Dopplerultraschall-Transducer gesendet, vom fetalen Herzen reflektiert und von der Ultraschallsonde wieder empfangen. Über die meist eingesetzte Autokorrelations-Verarbeitung wird die Herzfrequenz des Kindes errechnet. Das Kardiogramm spiegelt damit zu meist die Herzschläge nicht eins zu eins wider. Vielmehr sind je nach verwendetem Algorithmus etwa fünf Herzzyklen in Folge nötig, um aus störungsreichen Dopplerrohsignalen den tatsächlichen Verlauf der fetalen Herzfrequenz zu rekonstruieren [64]. Ein CTG gilt nur dann als auswertbar, wenn die Signalausfallrate unter 15% liegt. Bei Beginn der Registrierung und in Zweifelsfällen muss die Herzfrequenz der Mutter von der des Feten unterschieden werden. Hierzu kann die maternale Herzfrequenzaufzeichnung, die in manchen CTG-Geräten bereits integriert ist, parallel auf dem CTG aufgezeichnet werden. Bei Mehrlingen müssen die Herzfrequenzen aller Kinder getrennt abgeleitet werden. In Ausnahmefällen (bei nicht sicher beurteilbarer FHF, speziell in der Austreibungsperiode, sowie beim ersten Mehrling) ist das Anlegen einer Skalpelektrode direkt am vorangehenden fetalen Teil (z. B. Kopf) sinnvoll [61].

Die Registrierung von Wehen erfolgt über einen abdominalen Drucktransducer, der den durch die Wehen ausgelösten Spannungszustand der Bauchdecken in ein Schreibsignal, das Tokogramm, umwandelt. Es können hierdurch Informationen über die Wehenhäufigkeit und Wehendauer gewonnen werden. Die Wehenstärke ist über einen externen Transducer allenfalls im Vergleich der Amplituden relativ, und insgesamt nur arbiträr erfassbar. Eine intraamniotische Druckableitung ist entbehrlich. Die simultane Registrierung von Wehen und FHF definiert das CTG und wird generell empfohlen.

Bei Geräten mit integrierter Erkennung von niederfrequenten Bewegungssignalen des Kindes werden diese aus denselben Dopplersignalen des FHF-Transducers – jedoch mit anderer Signalerkennungstechnik – extrahiert und in einem dritten Kanal dargestellt (Kineto-Kardiotokogramm = K-CTG).

#### 3.2 Registrierdauer, Körperhaltung, Schreibgeschwindigkeit

Antepartual bzw. bei der Aufnahme in den Kreißaal (Eintritts-CTG) beträgt die übliche (Mindest-)Registrierdauer 30 Minuten. Das CTG sollte insbesondere im letzten Trimenon in halblinker bzw. linker Seitenlage der Mutter geschrieben werden, um ein Vena-cava-Syndrom zu vermeiden.

Die Schreibgeschwindigkeit (Vorschub) des Papiers beträgt üblicherweise 1 cm/min, die visuelle Auflösung ist allerdings bei einer Geschwindigkeit von 2 oder 3 cm/min besser. In jeder Klinik sollte man sich jedoch auf eine Geschwindigkeit festlegen,

um die notwendige Sicherheit in der Interpretation zu gewährleisten.

#### 3.3 Beurteilungsparameter

Von der fetalen Herzfrequenz werden

- ▶ basale fetale Herzfrequenz (Basisfrequenz),
- ▶ Akzelerationen,
- ▶ Dezelerationen,
- ▶ Oszillationen,
- ▶ Oszillationsamplitude (Bandbreite),
- ▶ Langzeitoszillationen (Oszillationsfrequenz)

klassifiziert. Es handelt sich hierbei um lang-, mittel- und kurzfristige Merkmale, die aus der FHF-Verlaufskurve extrahiert werden. Die Dezelerationen werden bei Vorhandensein von Wehen in uniforme frühe und späte einerseits sowie variable Dezelerationen andererseits unterteilt.

Über das Tokogramm lassen sich im Wesentlichen Frequenz, Dauer, Form und Regularität der Wehen erfassen, bei intraamniotischer Druckaufnahme auch der Basaltonus und die Amplitude (mmHg).

### 4 Klinische Wertigkeit

#### 4.1 Antepartual

Routinemäßig wird derzeit bei über 90% der Schwangeren ein CTG geschrieben, wobei die Anfertigung des CTG im Niedrigrisikokollektiv zu keiner Verbesserung der perinatalen Daten führt ([37,61,84]; EL IIa). Insbesondere liegen auch keine validierten Studien zum Einsatz im Nichtrisikokollektiv in frühen Schwangerschaftswochen (< 34) vor.

Die vier vorliegenden randomisierten Studien [11,27,48,56] zeigen aber selbst in Risikokollektiven keine Verringerung der perinatalen Mortalität bzw. Morbidität ([3,54,77]; EL Ia). Beim Einsatz des CTG in Hochrisikokollektiven ohne additive Zusatzdiagnostik lässt sich in einer Metaanalyse sogar eine signifikante Erhöhung der perinatalen Mortalität feststellen (EL Ia). Eine iatrogen induzierte erhöhte Rate an Frühgeburten mag die wesentliche Ursache hierfür sein. Hierzu trägt die hohe Falschpositivrate des CTG bei gleichzeitig hoher Inter- und Intraobservervariabilität bei ([9,14,55,99]; EL IIa).

Die Kombination mit der Dopplersonografie in Risikokollektiven führte inzwischen zu einer Abnahme der perinatalen Mortalität um etwa 30% ([107]; EL Ia), sodass der fetale Zustand bei auffälligem CTG insbesondere im Bereich der Frühgeburtlichkeit durch den Einsatz der Dopplersonografie validiert werden sollte.

#### 4.2 Subpartual

Die ersten, inzwischen länger zurückliegenden prospektiv randomisierten Studien [30,36,38–40,47,49,52,53,57,58,60,69,70,79,86,92,109] fanden selbst in Hochrisikokollektiven keine Verbesserung des perinatalen Outcomes, abgesehen von einer Reduktion von Krämpfen im Neugeborenenalter ([97,98]; EL Ia). Das ACOG kam sogar zu dem Schluss, dass die intermittierende Auskultation in vorgegebenen Intervallen der CTG-Überwachung gleichwertig sei [4]. Bei Verzicht auf die CTG-Überwachung wäre die Auskultation jedoch zeit- und personalintensiv und erlaubt unter medikolegalem Blickwinkel nur eine lückenhafte Dokumentation [75] sowie kein frühzeitiges Erkennen der Verschlechterung des fetalen Zustands.

Nachfolgende, neuere Studien ergeben allerdings Vorteile der elektronischen CTG-Registrierung [12,15,23,26,61,68,76]:

Nach Vintzileos führt die computerisierte CTG-Überwachung gegenüber der alleinigen Überwachung durch Auskultation zu einer Reduktion der hypoxiebedingten perinatalen Mortalität ([92, 103, 104]; EL 1b) und zu einer signifikant verbesserten Erkennung der verschiedenen Formen der Geburtsazidose ([93, 103, 104]; EL 1b). Eine Metaanalyse von neun Studien belegt eine Reduktion der perinatalen Mortalität von über 50%, allerdings unter Inkaufnahme einer Erhöhung der Rate operativer Entbindungen um den Faktor 2,5 ([94]; EL 1a). Nach Nelson ist das spätere Auftreten von Zerebralparese und neonataler Enzephalopathie signifikant mit späten Dezelerationen im CTG (OR 3,9) und eingeschränkter Variabilität (OR 2,7) assoziiert ([71]; EL IIa). Nach Gaffney finden sich bei abnormen CTG-Mustern signifikant höhere Raten neonataler Enzephalopathien und Zerebralparesen ([28, 29]; EL IIa). Nach Spencer geht ein abnormes CTG-Muster – beurteilt nach FIGO – ebenfalls mit einer signifikant höheren neonatalen Enzephalopathie einher ([93]; EL IIa).

Das NICHD in den USA hat 2008 in einem Consensus Meeting eine Neueinteilung von CTG-Mustern in I: normal, II: unbestimmt und III: abnormal vorgenommen [61, 76]. Dies mündete dann in praktische Empfehlungen des ACOG zur Nomenklatur und Interpretation von CTG-Mustern [4], in Empfehlungen zum intrapartalen Management [5], sowie in eine Subklassifikation auf der Basis der Assoziation mit neonataler metabolischer Azidose [23].

Die fetale Überwachung mit modernen Monitoringsystemen kann durch fehlerhafte Zuordnung mütterlicher Herzfrequenzsignale zum fetalen CTG-Signal zu mehrdeutigen Herzfrequenzregistrierungen führen [68]. Das Risiko der Verknüpfung fetaler Risiken insbesondere in der Austreibungsperiode veranlasste das FDA zu einer aktuellen Warnmeldung [26]. Als Lösung zur Klärung fragwürdiger Herzfrequenzmuster wird u.a. die interne CTG-Ableitung empfohlen. Auch die simultane pulsoxymetrische Aufzeichnung des mütterlichen Herzfrequenzsignals ist geeignet, um sicherzustellen, dass im CTG tatsächlich der Fetus überwacht wird [15].

## 5 Empfehlungen

### 5.1 Patientensicherheit

Die abgegebene niedrige Ultraschallenergie über das eingesetzte Dopplerverfahren bei der Detektion der FHF bzw. der Kindsbewegungen hat bisher zu keinem Bericht über schädigende Effekte geführt.

Bei Verwendung einer direkt am Skalp angebrachten Kopfschwartenelektrode sind in bis zu 1,3% der Fälle Infektionen und Verletzungen beschrieben [6].

Als Beitrag zur Patientensicherheit sollten der Einsatz der Kardiotokografie und der nach dem gleichen Prinzip arbeitenden Verfahren (z.B. K-CTG) trotz fehlender Gefährdungshinweise nur bei den unter 5.3 und 5.4 angegebenen Indikationen erfolgen. Bei ausreichender Signalqualität kann subpartual auf die Anwendung einer fetalen Skalpелеktrode verzichtet werden.

### 5.2 Registrierdauer und Häufigkeit

Als Grundlage zur Bewertung eines CTG nach dem FIGO-Score ist eine Registrierdauer von 30 Minuten erforderlich. Bei suspektem FHF-Muster sollte die Registrierdauer verlängert werden. Bei speziellen Analyseverfahren (z.B. Dawes & Redman; Oxford System) ist bei rückversicherndem Ergebnis eine Verkürzung bis auf 10 Minuten möglich. Die maximale Registrierdauer, nach der

eine „Oxford“-Analyse durchgeführt werden sollte, beträgt 60 Minuten.

Die Häufigkeit der Registrierung richtet sich nach dem individuell klinisch und kardiotokografisch ermittelten Risiko. Sie kann von einmal bei einem ambulanten Besuch über mehrmals täglich bis hin zur Dauerüberwachung reichen.

Bei ambulanter Überwachung und Registrierintervallen von über vier Tagen sollten insbesondere bei den unter 5.3 kursiv angegebenen Diagnosen additive Verfahren mit längerer Vorwarnzeit (Dopplersonografie, US-Fruchtwassermenge, K-CTG) zum Einsatz kommen.

### 5.3 Indikationen antepartual

Die Autoren halten den bisherigen Indikationskatalog der Mutterschaftsrichtlinien mit nur drei Erstindikationen für die CTG-Registrierung (drohende Frühgeburt ab der 26. SSW, auskultatorisch festgestellte Herztonalterationen, Verdacht auf vorzeitige Wehentätigkeit) für dringend änderungsbedürftig und haben folgende Empfehlungen in Anlehnung an die Empfehlungen des SOGC erarbeitet:

Die Indikation für eine antepartuale CTG-Registrierung bestehen bei (alphabetische Reihenfolge)

- ▶ Anämie der Mutter (Hämoglobin < 10 g/dl oder ≤ 6 mmol/l),
- ▶ Arrhythmien des Feten (speziell Tachyarrhythmien) im Ultraschall,
- ▶ Blutungen während der Spätschwangerschaft,
- ▶ Blutgruppeninkompatibilität,
- ▶ *Bluthochdruck* (≥ 140/90 mmHg),
- ▶ Diabetes mellitus Typ I bzw. Typ II,
- ▶ fetale Dopplerbefunde suspekt oder pathologisch (z.B. PI in Arteria umbilicalis > 90. Perzentile),
- ▶ Drogenabusus (z.B. Nikotinabusus),
- ▶ Hydramnion (AFI > 25 cm),
- ▶ Infektionen viral (z.B. Parvovirus B19) und bakteriell (AIS),
- ▶ Kindsbewegungen vermindert,
- ▶ Kreislaufinstabilität maternal (orthostatische Probleme),
- ▶ *Mehrlingsschwangerschaft*,
- ▶ *Oligohydramnion* („single-pocket“ < 2 cm),
- ▶ Terminüberschreitung > 7 Tage,
- ▶ Unfall mit abdominalem Trauma oder schwerer mütterlicher Verletzung,
- ▶ vorzeitigen Wehen (Tokolyse)/drohender Frühgeburt,
- ▶ *Wachstumsrestriktion* < 10. Perzentile [106].

Bei den kursiv geschriebenen Indikationen sollte zusätzlich eine Doppleruntersuchung erfolgen.

### 5.4 Indikationen subpartual

Ein 30-minütiges Aufnahme-CTG zum primären Ausschluss einer Gefährdung des Feten und zum Nachweis von Kontraktionen wird für sinnvoll gehalten [43].

Die subpartuale Überwachung kann bei risikofreien Schwangerschaften und in der frühen Eröffnungsperiode unauffälligem CTG intermittierend alle 30 Minuten bis maximal zwei Stunden elektronisch (mindestens 30 Minuten Registrierdauer), bei fehlender Registriermöglichkeit auch durch Auskultation (mindestens 10 Minuten mit strikter Dokumentation) erfolgen [41, 90]. In der späten Eröffnungs- und während der Austreibungsperiode soll das CTG kontinuierlich geschrieben werden. Bei Risikoschwangerschaften (s. antepartuale Indikationen zum CTG) bzw. unter der Geburt vorgenommenen Maßnahmen wie Wehenmittelgabe oder Komplikationen wie Fieber, Blutungen, grünem Fruchtwasser) soll bei registrierbarer Kontraktionstätigkeit eine kontinuier-



liche CTG-Überwachung während der gesamten Eröffnungs- und Austreibungsperiode erfolgen (ACOG, SOGC, RCOG).

Eine CTG-Registrierung ist auch bei Tokolyse oder der Gabe von wehenfördernden Medikamenten (Oxytocin, Prostaglandine) – sofern Wehen nachweisbar sind – indiziert.

Pathologische FHF-Muster sollen bei Persistenz über 30 Minuten durch eine fetale Blutgasanalyse (FBA) am vorangehenden fetalen Pol – sofern technisch durchführbar – abgeklärt werden. Auch die Laktatbestimmung kann hierzu additive Informationen liefern

bzw. gilt nach ACOG-Kriterien als Alternative zur Blutgasanalyse [4]. Ausnahmen sind schwere fetale Bradykardien, prolongierte Dezelerationen > 3 min oder andere hochpathologische CTG-Muster (z. B. sinusoidales Muster), die eine sofortige Intervention mit Geburtsbeendigung erfordern.

## 5.5 Klassifizierung

### 5.5.1 Einzelparameter der FHF und Bewertungsschema (Tab. 3)

**Tab. 3** Parameter der FHF und deren Definition (modifiziert n. ACOG, FIGO, SOGC, RCOG).

| Terminologie                    | Definition                                                                                                                                                                                                                                                                                                                                                                                                                                                                                                                                                                                                                                                                                                                                                                                                                                                                                                                                                                                                                                                                                                                                                         |
|---------------------------------|--------------------------------------------------------------------------------------------------------------------------------------------------------------------------------------------------------------------------------------------------------------------------------------------------------------------------------------------------------------------------------------------------------------------------------------------------------------------------------------------------------------------------------------------------------------------------------------------------------------------------------------------------------------------------------------------------------------------------------------------------------------------------------------------------------------------------------------------------------------------------------------------------------------------------------------------------------------------------------------------------------------------------------------------------------------------------------------------------------------------------------------------------------------------|
| Grundfrequenz (SpM)             | Ist die mittlere beibehaltene FHF über mindestens 10 Minuten in Abwesenheit von Akzelerationen bzw. Dezelerationen in Schlägen pro Minute (SpM). Im Bereich der fetalen Unreife liegt die mittlere FHF eher im oberen Streubereich. Ein zunehmender Anstieg der FHF muss besonders beachtet werden!                                                                                                                                                                                                                                                                                                                                                                                                                                                                                                                                                                                                                                                                                                                                                                                                                                                                |
| ▶ normal                        | Normalbereich: 110–160 SpM*                                                                                                                                                                                                                                                                                                                                                                                                                                                                                                                                                                                                                                                                                                                                                                                                                                                                                                                                                                                                                                                                                                                                        |
| ▶ suspekt                       | leichte Bradykardie: 100–109 SpM                                                                                                                                                                                                                                                                                                                                                                                                                                                                                                                                                                                                                                                                                                                                                                                                                                                                                                                                                                                                                                                                                                                                   |
|                                 | leichte Tachykardie: 161–180 SpM ohne gleichzeitige Akzelerationen                                                                                                                                                                                                                                                                                                                                                                                                                                                                                                                                                                                                                                                                                                                                                                                                                                                                                                                                                                                                                                                                                                 |
| ▶ pathologisch                  | schwere Bradykardie: < 100 SpM                                                                                                                                                                                                                                                                                                                                                                                                                                                                                                                                                                                                                                                                                                                                                                                                                                                                                                                                                                                                                                                                                                                                     |
|                                 | schwere Tachykardie: > 180 SpM                                                                                                                                                                                                                                                                                                                                                                                                                                                                                                                                                                                                                                                                                                                                                                                                                                                                                                                                                                                                                                                                                                                                     |
| Bandbreite (Variabilität) (SpM) | Fluktuationen der fetalen Grundfrequenz treten 3–5-mal pro Minute auf. Bandbreite ist die SpM-Differenz zwischen höchster und tiefster Fluktuation überwiegend innerhalb des 30-minütigen Registrierstreifens.                                                                                                                                                                                                                                                                                                                                                                                                                                                                                                                                                                                                                                                                                                                                                                                                                                                                                                                                                     |
| ▶ normal                        | > 5 SpM im kontraktionsfreien Intervall                                                                                                                                                                                                                                                                                                                                                                                                                                                                                                                                                                                                                                                                                                                                                                                                                                                                                                                                                                                                                                                                                                                            |
| ▶ suspekt                       | < 5 SpM und > 40 Minuten, aber < 90 Minuten oder > 25 SpM                                                                                                                                                                                                                                                                                                                                                                                                                                                                                                                                                                                                                                                                                                                                                                                                                                                                                                                                                                                                                                                                                                          |
| ▶ pathologisch                  | < 5 SpM und > 90 Minuten                                                                                                                                                                                                                                                                                                                                                                                                                                                                                                                                                                                                                                                                                                                                                                                                                                                                                                                                                                                                                                                                                                                                           |
| Akzelerationen                  | Anstieg der FHF > 15 SpM bzw. > ½ Bandbreite und > 15 Sekunden**                                                                                                                                                                                                                                                                                                                                                                                                                                                                                                                                                                                                                                                                                                                                                                                                                                                                                                                                                                                                                                                                                                   |
| ▶ normal                        | zwei Akzelerationen in 20 Minuten                                                                                                                                                                                                                                                                                                                                                                                                                                                                                                                                                                                                                                                                                                                                                                                                                                                                                                                                                                                                                                                                                                                                  |
| ▶ suspekt                       | periodisches Auftreten mit jeder Wehe                                                                                                                                                                                                                                                                                                                                                                                                                                                                                                                                                                                                                                                                                                                                                                                                                                                                                                                                                                                                                                                                                                                              |
| ▶ pathologisch                  | keine Akzeleration > 40 Minuten (Bedeutung noch unklar, Bewertung daher fraglich)                                                                                                                                                                                                                                                                                                                                                                                                                                                                                                                                                                                                                                                                                                                                                                                                                                                                                                                                                                                                                                                                                  |
| Dezelerationen                  | Abfall der FHF > 15 SpM bzw. > ½ Bandbreite und > 15 Sekunden                                                                                                                                                                                                                                                                                                                                                                                                                                                                                                                                                                                                                                                                                                                                                                                                                                                                                                                                                                                                                                                                                                      |
| ▶ normal                        | keine                                                                                                                                                                                                                                                                                                                                                                                                                                                                                                                                                                                                                                                                                                                                                                                                                                                                                                                                                                                                                                                                                                                                                              |
| ▶ suspekt                       | Frühe: Uniforme, wehenabhängig periodisch wiederholte Absenkung der FHF, früher Beginn mit der Wehe. Rückkehr zur Grundfrequenz am Ende der Wehe.<br><b>Variable Dezelerationen</b> in Form, Dauer, Tiefe und zeitlicher Abhängigkeit von Wehen, intermittierend/periodische wiederholte Absenkung der FHF mit raschem Beginn und rascher Erholung. Auch isoliertes Auftreten (in Verbindung mit Kindsbewegungen).<br><b>Verlängerte Dezelerationen:</b> Abrupter Abfall der FHF unter die Grundfrequenz um mind. 60–90 Sekunden < 3 Minuten.                                                                                                                                                                                                                                                                                                                                                                                                                                                                                                                                                                                                                      |
| ▶ pathologisch                  | <b>Späte:</b> Uniforme, wehenabhängig periodisch wiederholte Absenkung der FHF, Beginn zwischen Mitte und Ende der Wehe. Nadir > 20 Sekunden nach Wehengipfel. Rückkehr zur Grundfrequenz nach dem Ende der Wehe. Bei einer Bandbreite < 5 SpM sind auch Dezelerationen < 15 SpM gültig.<br><b>Atypisch variable</b> Dezelerationen mit einem der zusätzlichen Merkmale:<br>▶ Verlust des primären bzw. sekundären FHF-Anstiegs,<br>▶ langsame Rückkehr zur Grundfrequenz nach Kontraktionsende,<br>▶ verlängert erhöhte Grundfrequenz nach der Wehe,<br>▶ biphasische Dezeleration,<br>▶ Oszillationsverlust während der Dezeleration,<br>▶ Fortsetzung der Grundfrequenz auf niedrigerem Level.<br><b>Verlängerte Dezelerationen:</b> Als pathologisch zu werten, wenn sie über zwei Wehen bzw. > 3 Minuten anhalten.<br><b>Sinusoidales Muster:</b> Langzeitschwankung der Grundfrequenz wie Sinuswelle. Das glatte, undulierende Muster von mind. 10 Minuten besitzt eine relativ fixe Wiederkehr von 3–5 Zyklen pro Minute und eine Amplitude von 5–15 SpM ober- und unterhalb der Grundfrequenz. Eine Grundfrequenzvariabilität lässt sich nicht nachweisen. |

\* Neuere Untersuchungen zeigen, dass der physiologische Bereich der fetalen Herzfrequenz am Termin vermutlich zwischen 115 (4. Perz.) und 160 Schlägen pro Minute (96. Perz.) liegt ([17, 105]; EL II).

\*\* < 32 SSW Anstieg der FHF > 10 SpM bzw. > ½ Bandbreite und > 10 Sekunden. Bei Akzelerationen > 10 Minuten spricht man von Baseline-Veränderungen.

Die Autoren empfehlen folgende Bewertung des CTG nach normal/suspekt/pathologisch („NSP“-Schema) (● Tab. 4 und 5):

**Tab. 4** Bewertung der Einzelparameter der FHF (modifiziert n. ACOG, FIGO, SOGCRCOG).

| Parameter    | Grundfrequenz (SpM)                       | Bandbreite (SpM)         | Dezelerationen                                                                 | Akzelerationen                                                  |
|--------------|-------------------------------------------|--------------------------|--------------------------------------------------------------------------------|-----------------------------------------------------------------|
| normal       | 110–160                                   | ≥ 5                      | keine <sup>1</sup>                                                             | vorhanden, sporadisch <sup>2</sup>                              |
| suspekt      | 100–109<br>161–180                        | < 5 ≥ 40 Minuten<br>> 25 | frühe/variable Dez.<br>einzelne verlängerte Dez. bis 3 Minuten                 | vorhanden, periodisch<br>(mit jeder Wehe)                       |
| pathologisch | < 100<br>> 180<br>sinusoidal <sup>3</sup> | < 5 > 90 Minuten         | atypische variable Dez.<br>späte Dez.<br>einzelne verlängerte Dez. > 3 Minuten | fehlen > 40 Minuten (Bedeutung noch unklar, Bewertung fraglich) |

<sup>1</sup> FHF-Dezelerationsamplitude ≥ 15 SpM, Dauer ≥ 15 Sekunden

<sup>2</sup> FHF-Akzelerationsamplitude ≥ 15 SpM, Dauer ≥ 15 Sekunden

<sup>3</sup> sinusoidale FHF: ≥ 10 SpM, Dauer ≥ 10 Minuten

**Tab. 5** FHF-Klassifikation in normal, suspekt, pathologisch einschl. Handlungsbedarf (n. FIGO).

| Kategorie    | Definition                                                                                                                |
|--------------|---------------------------------------------------------------------------------------------------------------------------|
| normal       | alle vier Beurteilungskriterien normal (kein Handlungsbedarf)                                                             |
| suspekt      | mindestens ein Beurteilungskriterium suspekt und alle anderen normal (Handlungsbedarf: konservativ)                       |
| pathologisch | mindestens ein Beurteilungskriterium pathologisch* bzw. zwei oder mehr suspekt (Handlungsbedarf: konservativ und invasiv) |

\* gilt nicht für Akzelerationen

Das CTG muss subpartual ständig klassifiziert werden. Dabei ist jeweils ein 30-Minuten-Abschnitt mit der höchsten Dichte an suspekten bzw. pathologischen FHF-Parametern (soweit vorhanden) zu analysieren. Bei unauffälligem Muster genügt ein Eintrag auf dem CTG bzw. in der Akte mit identifizierbarer Signatur (s. Dokumentation) ca. alle zwei Stunden (z. B. N für Normal). Die Bewertung kann durch die Hebamme oder den Arzt vorgenommen werden.

Bei Einstufung „suspekt“ sollte eine wiederholte Beurteilung nach ca. 30 Minuten mindestens mit einer Angabe der Anzahl der suspekten Parameter dokumentiert werden (z. B. S1 für „1 suspekter Parameter“). Zur Klärung oder Verbesserung des Musters können konservative Maßnahmen erfolgen (z. B. Lagewechsel, Infusion).

Bei Einstufung „pathologisch“ muss eine ständige Beurteilung erfolgen, die alle ca. 10 Minuten zusammen mindestens mit der Angabe der Anzahl suspekter Parameter dokumentiert wird (z. B. S2 oder P4 für 4 pathologische Parameter). Neben dem Ergreifen konservativer Maßnahmen (z. B. Tokolyse, Weckversuch, Lagewechsel, Infusion, O<sub>2</sub>-Gabe) ist eine Blutgasanalyse beim Feten (FBA) vorzunehmen, wenn dies möglich oder sinnvoll ist (Ausnahme z. B. Ende der Pressperiode). Falls keine Verbesserung des CTG-Musters in einem der drei bedeutsamen Parameter erzielbar ist bzw. die FBA pathologische Werte (● Tab. 6) anzeigt, ist die rasche Entbindung indiziert.

### 5.5.2 FIGO-Guidelines

Die FIGO-Guidelines sind sowohl ante- wie subpartual einsetzbar. Sobald eines der angegebenen Kriterien als suspekt bzw. pathologisch definiert ist, gilt das gesamte CTG als suspekt bzw. pathologisch. Es wird ebenfalls beim Zusammentreffen zweier suspekter Kriterien als pathologisch eingestuft (vgl. ● Tab. 5). Der FIGO-Score ist bisher der einzige auf breitem Konsens beruhende Score. Die Beurteilung eines CTG durch einen Score zwingt zu einer intensivierten Auseinandersetzung mit der CTG-Registrierung und schafft die Möglichkeit einer objektiveren Verlaufskontrolle [34]. Je komplexer ein Score angelegt ist, desto schlechter ist allerdings seine Reproduzierbarkeit. Die beste Reproduzierbarkeit besitzen Bewertungsschemata mit den Kategorien CTG-Kriterien mit und ohne Handlungsbedarf. Bei pathologischem FIGO-Score ist die postnatale Morbidität erhöht [93]. Es sollte nochmals darauf hingewiesen werden, dass die Evidenz der o.g. CTG-Kriterien erst nach der 34. SSW gesichert sind. Unterhalb gelten andere Kriterien s. \*\*Akzelerationen [4].

### 5.5.3 Elektronische Online-Auswertung

Studien zur Inter- und Intraobservierbarkeit zeigen, dass durch die Einführung einer computergestützten Klassifizierung der CTG-Registrierung eine insgesamt zuverlässigere Einordnung des CTG-Musters möglich wird [37, 46]. Insbesondere kann eine zeitnahe Bewertung vorgenommen werden, falls die CTG-Analyse „online“ erfolgt. Die verschiedenen Methoden zur Online-Auswertung (z. B. Dawes/Redman, DMW-FIGO, [89]) können aufgrund ihrer Reliabilität derzeit alle empfohlen werden. Das System Monica (AN24) erlaubt nach der Applizierung von fünf Elektroden auf dem mütterlichen Abdomen u. a. die elektrokardiografische Langzeitaufzeichnung der fetalen Herzfrequenz und ist sowohl für den antepartualen als auch für den subpartualen Bereich zugelassen. Die uterine Aktivität kann durch ein Elektrohysterogramm mit vergleichbaren Ergebnissen zur Tokografie dargestellt werden [35].

Evidenzbasierte Studien zur Auswirkung von Langzeitaufzeichnungen auf die perinatale Mortalität und Morbidität zu diesen Systemen liegen allerdings noch nicht vor [51].

Automatisierte, computerisierte CTG-Analysen führen zu einer Verbesserung der intra- und interindividuellen Reproduzierbarkeit [88, 89]. Es ist darauf zu achten, dass mit geeigneten Fortbildungsmaßnahmen die erforderlichen grundlegenden Kenntnisse über Physiologie und Pathophysiologie des fetalen Kreislaufsystems für die Bewertung des CTGs vermittelt werden.

## 6 Diagnostische Zusatztests und deren Wertigkeit

### 6.1 Antepartual

#### 6.1.1 Ruhe-CTG (Non-Stress-Test)

Das Ruhe-CTG wird im internationalen Sprachgebrauch auch als Non-Stress-Test (NST) bezeichnet.

Physiologische Grundlagen: Der NST basiert auf der Annahme, dass ein Fetus bei Wohlbefinden seine Herzfrequenz über autonome Einflüsse des sympathischen bzw. parasympathischen Nervensystem moduliert. Die Herzfrequenzsteuerung des nicht deprimierten Fetus beantwortet die physiologisch auftretenden Kindsbewegungen mit einer Akzeleration der Herzfrequenz (gültig ab 34. SSW).

**Beurteilung des NST:** Im NST wird das Kardiotokogramm ohne induzierte Wehen beurteilt. Bewertet werden die Akzelerationen der fetalen Herzfrequenz, die mit den Bewegungen des Kindes auftreten. Ein reaktives Muster liegt bei einer 20-minütigen Registrierung mit zwei bewegungsassoziierten FHF-Akzelerationen vor. Die Abnahme von Akzelerationen (Kindsbewegungen) oder ihr völliges Fehlen kann auf einen fetalen O<sub>2</sub>-Mangel hinweisen. Neben dem Akzelerationsverlust ist insbesondere der Variation der fetalen Herzfrequenz Beachtung zu schenken. Ein „silentes“ Oszillationsmuster mit einer Bandbreite < 5 Schlägen/Minute ist bei längerem Bestehen (> 90 min) mit einer erhöhten perinatalen Morbidität verbunden [71].

**Evidenzbasierung des NST:** Die Analyse der vier prospektiv randomisierten Untersuchungen [11, 27, 48, 56] zum Einsatz des antepartualen Non-Stress-CTG zeigt keinen erkennbaren Vorteil ([77]; EL Ia). Somit kann unter dem Gesichtspunkt der Evidenzbasierung die routinemäßige Anwendung des NST *nicht empfohlen werden*.

#### 6.1.2 Wehenbelastungstest (Stress-Test)

Im Wehenbelastungs-/Kontraktionstest wird die fetale Herzfrequenz während einer Kontraktion des Uterus beurteilt. Der Kontraktionstest beruht entweder auf spontaner oder induzierter Wehentätigkeit (Oxytocinapplikation als Oxytocinbelastungstest = OBT). Physiologische Grundlage des Kontraktionstests ist die kurzfristige Einschränkung der uterinen Perfusion während der Kontraktion. Bei einer „Borderline“-Oxygenation kann es dabei zum Auftreten von FHF-Dezelerationen kommen.

Auch der OBT weist *keinen evidenzbasierten klinischen Vorteil* auf ([94, 97]; EL IIa). Die Falschpositivrate beträgt bis zu 50%. Als unerwünschte Nebenwirkungen des OBT können Polysystolien und Dauerkontraktionen mit fetaler Bradykardie auftreten.

#### 6.1.3 Dopplersonografie

Die Dopplersonografie (DS) ist bei Verwendung einer Hüllkurvenanalyse und der Analyse der systolisch-diastolischen Variabilität besser reproduzierbar als das CTG und alle CTG-basierten Tests einschließlich des OBT. Als einzige Methode konnte bei der DS im antepartualen Einsatz in Risikokollektiven (siehe „Mutterchaftsrichtlinien“) in prospektiv randomisierten Studien eine signifikante ca. 30%ige Reduktion der perinatalen Mortalität ohne eine Erhöhung der operativen Interventionsrate festgestellt werden ([107]; EL Ia). Gleichzeitig besitzt die Untersuchung der Arteria umbilicalis den deutlichsten Vorwarnereffekt vor Auftreten pathologischer CTG-Muster (ca. drei Wochen zwischen 24. und 37. SSW) im Vergleich zu allen anderen Überwachungsverfahren. Da eine in den Mutterschaftsrichtlinien verankerte Indikation zum Einsatz der antenatalen DS die „suspekte“ fetale FHF-Registrierung ist, sollte diese Methode bei Schwangerschaften vor dem

Terminzeitraum (< 37 + 0 SSW) und pathologischer FHF *stets eingesetzt werden*, um eine vorzeitig iatrogen induzierte Frühgeburt zu vermeiden.

Bei pathologischen DS-Befunden (insbesondere bei Kreislaufzentralisation, enddiastolischem Null- und Umkehrfluss in arteriellen bzw. venösen Gefäßen) sollte die FHF-Registrierung zum Einsatz kommen, da sie eine kontinuierlichere Überwachung erlaubt und bei vorselektierten Kollektiven die Spezifität der FHF-Registrierung deutlich ansteigt.

Das venöse Kompartiment wird bei zunehmender Dekompensation nicht in jedem Fall pathologisch ([25]; EL IIa). Langzeituntersuchungen zum Stellenwert des venösen Dopplerverfahrens beim kompromittierten Feten liegen derzeit noch nicht vor.

#### 6.1.4 Fetale Stimulation

Durch fetale Stimulation (manuell, akustisch, lichtoptisch, am erfolgreichsten vibroakustisch) können die mit fetalen Tiefschlafperioden assoziierten nichtreaktiven oder eingeengten FHF-Muster teilweise abgeklärt werden. Die Inzidenz dieser Muster kann durch den Einsatz dieser Methode um 48% reduziert werden. Damit wird die Spezifität der CTG-Interpretation erhöht ([96]; EL IIa).

Es sollten allerdings nur ein bis maximal zwei kurz dauernde (1 s) Impulse, z. B. mit einem modifizierten Elektrolarynx, gesetzt werden, da bei intensiverer Anwendung fetale Gefährdungen beschrieben sind. Mögliche Auswirkungen auf das fetale Gehör sind bislang allerdings noch nicht ausreichend untersucht.

Da bisher evidenzbasiert keine Verbesserung des perinatalen Ergebnisses nachgewiesen wurde, besteht die bessere – aber nicht schnellere – Alternative in einer Verlängerung der Registrierdauer (> 40 min), um das Ende einer Schlafphase abzuwarten.

#### 6.1.5 Fetale Verhaltenszustände (fetal behavioral states)

In Termnähe finden sich in 80% der Feten periodisch wiederkehrende Verhaltenszustände, die auch unter der Geburt auftreten können. Es lassen sich vier verschiedene Verhaltenszustände klassifizieren ([73]; EL IIa). Fetale Tiefschlafperioden sind dabei durch eine eingeengte bis silente Bandbreite charakterisiert, die als hypoxieverdächtiges Muster fehlinterpretiert werden können. Verlängerung der Registrierdauer > 40 Minuten bzw. der Einsatz von Weckverfahren (z. B. vibroakustische Stimulation, s. o.) können helfen, zwischen beiden Diagnosen zu differenzieren. Dies ist vor allem vor dem Hintergrund wichtig, dass der Fet ca. 40% des Tages in Ruhezuständen, davon 25–35% im Tiefschlaf verbringt. Bei fehlender differenzierender Abklärung findet sich so ein hoher Anteil falsch positiver CTG-Befunde ([73]; EL IIa).

#### 6.1.6 Biophysikalisches Profil

Das biophysikalische Profil ist die synoptische Betrachtung der fetalen Atem- und Körperbewegungen, des Muskeltonus, der Fruchtwassermenge (via Ultraschall) sowie der fetalen Reaktivität (im Ruhe-CTG) in einem Score. Ziel dieses vor allem im anglo-amerikanischen Sprachraum als Absicherungstest genutzten Verfahrens ist eine angestrebte Verbesserung der Prädiktion einer fetalen Gefährdung gegenüber der Bewertung der Einzelkriterien. Obwohl zahlreiche Studien insbesondere bei negativem Ausfall einen hohen negativen Prädiktionswert aufwiesen, zeigt die metaanalytische Betrachtung in der Cochrane Database bezüglich des perinatalen Ergebnisses in randomisierten Studien keinen Vorteil ([2, 63]; EL Ia).

### 6.1.7 Fetale Bewegungen

Bei knapper Versorgung ökonomisiert der Fetus seine Energie, indem er unter anderem seine Bewegungsintensität einschränkt. Die Verkürzung der fetalen Kindsbewegungsdauer ist ein früher Hinweis (ca. 12–14 Tage) einer drohenden kindlichen Gefährdung. Die kontinuierliche elektronische Registrierung der Kindsbewegungen kann über ein sogenanntes Kineto-Kardiotokogramm (K-CTG) erfolgen. Im K-CTG werden additiv zum CTG in einem dritten Kanal Kindsbewegungen nach Anzahl und Dauer durch unterschiedliche Balkenlänge dargestellt. Über das Dopplerprinzip werden dabei durch einen geeigneten Algorithmus niederfrequente Signale von Extremitäten- und Körperbewegungen registriert. Die korrekte Bewegungserfassung ist dabei mit 81% Sensitivität und 98% Spezifität der mütterlichen Perzeption weit überlegen. Als pathologisch gilt eine Verkürzung der Kindsbewegungsdauer unterhalb der 5. Perzentile publizierter Normkurven ([33]; EL IIa). Die ebenfalls registrierte Kindsbewegungsanzahl wird erst sehr spät eingeschränkt und stellt somit keinen wertvollen Überwachungsparameter dar. Mit der Zuordnung von FHF-Akzelerationen zu Kindsbewegungen lässt sich bei suspekten FHF-Mustern z. B. die Lage der Baseline präzise definieren und so die Falschpositivrate um bis zu 50% senken ([33]; EL IIa).

## 6.2 Subpartual

### 6.2.1 Fetalblutanalyse sub partu

Die diskontinuierliche Fetalblutanalyse (FBA) mit der Saling-Technik [87] erlaubt eine zuverlässige Säuren-Basen-Diagnostik. Sie ist von Medikamenteneinwirkungen weitgehend unabhängig. Die Indikation zur FBA am fetalen Skalp ergibt sich aus dem Herzfrequenzmuster: Bei pathologischem CTG-Muster sollte kurzfristig eine FBA durchgeführt werden, Ausnahme: prolongierte Dezeleration > 3 Minuten; hier Vorbereitung zur raschen Geburtsbeendigung (► Tab. 6).

**Tab. 6** pH-Werte, PCO<sub>2</sub> und Base Excess (BE) aus dem Fetalblut (FBA) und empfohlenes Vorgehen (mod. nach FIGO).

| Fetalblutanalyse (FBA)*                                                                                   | Folgerung                                                                                                                           |
|-----------------------------------------------------------------------------------------------------------|-------------------------------------------------------------------------------------------------------------------------------------|
| pH ≥ 7,25                                                                                                 | FBA sollte bei persistierender FHF-Abnormalität innerhalb von 30 Minuten wiederholt werden.                                         |
| pH 7,21–7,24                                                                                              | FBA sollte innerhalb von 30 Minuten wiederholt oder die Entbindung erwogen werden (bei raschem pH-Abfall seit der letzten Messung). |
| pH ≤ 7,20<br>PCO <sub>2</sub> > 65 mmHg (resp. Azidose)<br>BE > -9,8 (z. B. -15) mmol/l<br>(met. Azidose) | Die rasche Entbindung ist insbesondere bei metabolischer Azidose indiziert.                                                         |

\* Alle Fetalblutmessungen sollten vor dem Hintergrund des initialen pH-Wertes, des Metabolismus, des Geburtsfortschrittes und der sonstigen klinischen Befunde bei Fet und Mutter interpretiert werden.

Kontraindikationen bzw. Hinderungsgründe für eine FBA sind (mod. n. RCOG)

- ▶ maternale Infektion (z. B. HIV, Hepatitis A, C, Herpes-simplex-Virus),
- ▶ fetale Gerinnungsstörungen (z. B. Hämophilie),
- ▶ Frühgeburtlichkeit (< 34 SSW),
- ▶ geschlossene Zervix bzw. ungenügend eröffneter Muttermund,
- ▶ nicht führender Mehrling,
- ▶ Ende der Pressperiode (rasche Entbindung ist anzustreben).

Der für die Hypoxämie-Diagnostik wesentliche Parameter des fetalen Blutes ist der aktuelle pH-Wert. Für klinische Konsequenzen sind die maternogene Aziditätssteigerung sowie der physiologische Abfall des pH-Wertes im fetalen Blut zu berücksichtigen. Die 10. Perzentile für pH-Werte des fetalen Blutes am Ende der Geburt ist am Termin 7,20. Neben der Aziditätsmessung sind für eine differenzierte Zustandsdiagnostik die pO<sub>2</sub>- und pCO<sub>2</sub>-Bestimmung und die Berechnung des Basenexzess sinnvoll. Weniger störanfällig soll die Bestimmung der Laktatkonzentration im fetalen Blut sein [1,21,81].

Der Stellenwert der FBA ist in der kombinierten Geburtsüberwachung mit dem CTG zu sehen. In Fällen nicht interpretierbarer oder abnormer FHF-Muster gibt die Bestimmung der Parameter des Säure-Basen-Haushalts die notwendige diagnostische Sicherheit.

Der Einsatz der FBA führt zu einer signifikanten Reduktion vermeidbarer operativer Entbindungen und zu einer Reduktion neonataler Krämpfe ([12,40,102–104,111,112]; EL II).

## 7 Dokumentations- und Aufbewahrungspflicht

Das CTG muss stets durch Hebamme oder Arzt beurteilt und identifizierbar abgezeichnet werden. Jedes CTG ist mit den wichtigsten Personalien der Schwangeren, der Schwangerschaftswoche sowie (falls nicht automatisch vorhanden) mit Datum und Uhrzeit zu beschriften. Unter Zugrundelegung der berufsrechtlichen Regelung in den einzelnen Bundesländern sind ärztliche Aufzeichnungen (CTG und Patientenakte) mindestens zehn Jahre (in einigen Bundesländern bis zu 30 Jahre) aufzubewahren. Bei der Verwendung elektronischer Speichermedien ist darauf zu achten, dass diese nicht überschreibbar bzw. löschar sind und die zeitliche Speichervorgabe erfüllen können [19,90].

## 8 Fort- und Weiterbildung

Es gibt evidenzbasierte Daten, dass eine regelmäßige CTG-Schulung das fetale Outcome verbessert. Dementsprechend sind derartige Schulungen und die Teilnahme daran zu fordern ([7,65]; EL IIa). Der Einsatz elektronischer Systeme mit integrierter Signalanalyse (unauffällig, suspekt, pathologisch) ist für die Aus- und Weiterbildung sinnvoll, da der Lernerfolg vor und nach der Schulung objektiv gemessen werden kann (EL Ia).

## 9 Weitere Entwicklungen

### 9.1 Antepartuale Diagnostik

#### 9.1.1 Automatisierte CTG-Auswertung

Die „Dawes-Redman-Kriterien“ dienen ausschließlich der antepartualen fetalen Zustandsbeschreibung durch eine computerisierte Analyse der fetalen Herzfrequenzvariabilität mit dem Ziel einer objektiven Beurteilung in kürzestmöglicher Zeit (minimal 10 min). Anhand von Korrelationen mit Outcome-Kriterien konnte gezeigt werden, dass das Erreichen der Dawes-Redman-Kriterien in hohem Maße eine Rückversicherung für einen ungefährdeten Feten darstellt ([16,95]; EL IIa).



Rückversichernde Kriterien:

- ▶ Kurzzeitvariation (Short term variation, STV) > 4 ms (die STV misst die Variation der durchschnittlichen absoluten zeitlichen Differenz zwischen konsekutiven Herzschlägen nur computerisiert erfassbar),
- ▶ Abwesenheit sinusoidaler Rhythmen,
- ▶ mindestens eine Episode hoher FHF-Variation,
- ▶ keine tiefen bzw. wiederholten FHF-Dezelerationen,
- ▶ FHF-Akzelerationen und oder fetale Bewegungen,
- ▶ Normokardie.

Insbesondere eine Abnahme der STV kann in serieller Beobachtung auf eine zunehmende Kompromittierung des Feten zwischen 25. und 38. SSW hinweisen (EL IIa), **Tab. 7**. Ursache hierfür ist eine Einschränkung im Zusammenspiel von Sympathicus und Parasympathicus.

**Tab. 7** Zusammenhang zwischen Kurzzeitvariation metabolische Azidose und intrauterinem Fruchttod (IUFT).

| STV (ms)             | < 2,6 | 2,6–3,0 | > 3,0 |
|----------------------|-------|---------|-------|
| metabolische Azidose | 10,3% | 4,3%    | 2,7%  |
| IUFT                 | 24,1% | 4,3%    | 0%    |

Allerdings liegen derzeit noch keine prospektiv randomisierten Studien vor, die den Nutzen der Methode belegen. Derartige Studien befinden sich in Auswertung (Oxford-, TRUFFLE-Studie).

### 9.1.2 Andere Ansätze

Eine andere Methode beschäftigt sich mit der elektronischen Quantifizierung relevanter Herzfrequenzmuster und deren Korrelation mit den perinatalen Daten (Q-CTG) ([80]; EL IIb).

Eine weitere Variante ist die Online-Analyse der fetalen Herzfrequenz nach dem FIGO-Schema in Form eines Ampelsystems (grün = o.B., gelb = suspekt, rot = pathologisch [Schindler 2002; IIb]). Das System wurde mit der visuellen Analyse von CTG-Experten getestet und führt zu einer signifikanten Verbesserung der Reproduzierbarkeit. Ein 3-stufiges System wird auch von einem Experten-Panel bevorzugt [61]. Seit Kurzem kann die STV nach Dawes/Redman auch geräteunabhängig online berechnet und mit dem FIGO-Score kombiniert werden [88].

Studien und Erfahrungen zum Einsatz von mobilen CTG-Geräten, die das telemedizinische Home Monitoring gestatten, zeigen übereinstimmend die Sicherheit der Technik und eine hohe Patientenzufriedenheit.

Die Einführung elektronischer Dokumentationssysteme wird aufgrund verschiedener Aspekte (Online-Auswertung mit höherer Reproduzierbarkeit) allgemein empfohlen (EL IV [35, 42, 76]). Entschieden abzulehnen sind aber alle Systeme, die in die ärztliche Entscheidungs- und Therapiehoheit eingreifen oder haftungsrechtliche Konsequenzen für den Arzt nach sich ziehen können.

Es ist derzeit allerdings noch offen, ob aus derartigen Analysen detaillierte bzw. verbindliche Handlungsempfehlungen abgeleitet werden können.

## 9.2 Subpartual

### 9.2.1 ST-Strecken-Analyse (STAN)\* \* mit direktem fetalen EKG

Der Anstieg der T-Wellen-Amplitude ist das Ergebnis eines vermehrten Glykogenabbaus der Myokardzellen während einer metabolischen Azidose. Der T/QRS-Quotient steigt daher mit zu-

nehmender fetaler Hypoxie und konsekutiver metabolischer Azidose während der Geburt an. Die Methode kann nach 36 abgeschlossenen Schwangerschaftswochen eingesetzt werden (Kontraindikationen für STAN und Fetalelektrode wie bei FBA).

Um klinische Schlussfolgerungen ziehen zu können, muss die FHF zusammen mit den „ST-events“-Markierungen analysiert werden.

Studien zeigen sowohl eine Reduktion der Rate operativer Entbindungen als auch eine Reduktion der Rate von Neugeborenen mit metabolischer Azidose. Die kontinuierliche Information über einen metabolischen Parameter ermöglicht unter gewissen Vorbedingungen (30-minütige Vorlaufregistrierung, anfängliche Prüfung des fetalen Säure-Basen-Haushalts des Feten) eine Reduzierung der FBA-Anzahl mit der Saling-Technik bei Erhalt der Überwachungssicherheit ([18, 67, 74, 108]; EL IIa).

Bei pathologischen Signalen ist jedoch die fetale Hypoxämie/Hypoxie häufig bereits weit fortgeschritten, sodass wenig Handlungsspielraum verbleibt.

Die Methode wurde in einem Cochrane-Review von 2006 [8, 67] zusammengefasst: In vier Studien mit knapp 10 000 Gebärenden wurden die Aussagekraft des CTG mit bzw. ohne zusätzlicher STAN-Analyse verglichen (EL Ia). In der Gruppe mit STAN wurden signifikant weniger Kinder mit schwerer Azidose, neonataler Enzephalopathie, operativer Entbindung und Skalplutuntersuchung geboren. Die geringere Azidosefrequenz in der mit STAN überwachten Gruppe wird weniger auf die schlechtere Sensitivität des CTG, sondern mehr auf zusätzliche Hinweise auf eine fetale Gefährdung durch den STAN zurückgeführt [83]. Die negativen Aspekte des STAN liegen in der Notwendigkeit der Überwachung mittels Skalpelektrode.

Das Hauptproblem der Evaluation der STAN-Methode liegt darin, dass keine Studie versucht hat, eine Vermeidung des „Treatment Paradox“ zu erzielen [66]. Hierunter versteht man, dass einem Test u.U. deshalb ein schlechter Vorhersagewert nachgesagt wird, weil während der Evaluationsphase der Kliniker in Kenntnis des Ergebnisses Fälle mit einem abnormen Ergebnis durch eine wirksame Therapie behandelt hat. Der Kliniker assoziiert dann ein abnormes Ergebnis mit einem guten Outcome. Auch das Umgekehrte kann der Fall sein.

*Bis zum Vorliegen einer solchen Studie kann die Methode nicht breit empfohlen werden.*

### 9.2.2 Pulsoxymetrie

Die fetale Pulsoxymetrie misst subpartual die Sauerstoffsättigung (FSpO<sub>2</sub>) z.B. an der kindlichen Wange bzw. am fetalen Skalp (durch Spiralelektrode). Tierexperimentelle und klinische Studien belegen, dass mit Unterschreiten von 30% FSpO<sub>2</sub> die Zahl fetaler Hypoxämien deutlich zunimmt [50].

In einem Cochrane-Review von 2004 erfüllt lediglich eine Studie die strengen Auflagen ([13, 22]; EL Ib). Obwohl die Schnittentbindungsrate wegen drohender Hypoxie in der Pulsoxymetrie-Gruppe niedriger lag, blieb die Gesamtrate unverändert. In einer Arbeit von 2006 [10] wurden über 5000 Gebärende methodologisch korrekt verglichen. In der einen Gruppe wurden die Pulsoxymetrie-Daten dem Kliniker während der Geburt mitgeteilt, in der anderen Gruppe konnten diese Signale nicht eingesehen werden. Die Kenntnisse der Pulsoxymetrie führten dabei weder zu einer Senkung der Schnittentbindungsrate noch zu einer Senkung der Azidoserate.

Zusätzlich zu diesen Daten scheint die Pulsoxymetrie eine geringere Sensitivität zur Erfassung eines fetalen Gefahrenzustands zu haben als das CTG [31]. Dies gilt insbesondere bei Auftreten einer

fetalen Anämie, bei welcher die Sauerstoffsättigung zwar sehr gut, die Sauerstoffversorgung des Körpers aber sehr schlecht sein kann.

Auch wenn technische Probleme von Signalverlusten aufgrund mangelhafter Sensorfixierung durch eine invasive Skalpelektrode weitgehend gelöst wurden, kann die Pulsoxymetrie als Zusatzverfahren zum Monitoring unter der Geburt nach der derzeitigen Datenlage *nicht empfohlen werden*.

## 10 Zusammenfassende Empfehlung

Antepartual ist das CTG geeignet, bei Risikoschwangerschaften, die durch Anamnese- bzw. Befundrisiken (s. Indikationen) ermittelt werden, Hinweise für eine drohende kindliche Gefährdung zu geben. Der Vorwarnzeitraum für eine Dekompensation variiert allerdings zwischen einem und vier Tagen. Es ist daher sinnvoll, bei chronisch gefährdeten Schwangerschaften zusätzliche Überwachungsinstrumente mit längerer Vorwarnzeit einzusetzen, wie die Dopplersonografie, die Ermittlung der Fruchtwassermenge per Ultraschall oder die Messung der Kindsbewegungsdauer mittels K-CTG. Die durch zahlreiche Stör- und Einflussgrößen bis zu 60% hohe Falschpositivrate des CTG kann durch Einsatz der Dopplersonografie, Verlängerung der FHF-Registrierdauer bzw. fetale Stimulation (Weckversuch) reduziert werden.

Das subpartuale CTG-Monitoring führt bei Analyse der hypoxiebedingten Morbidität sowohl zu einer signifikanten Reduktion der perinatalen Mortalität als auch zu einer signifikanten Reduktion der neonatalen Morbidität (Reduzierung der Häufigkeit von Krampfanfällen in der Neugeborenenperiode sowie der Häufigkeit von Zerebralpareesen). Die subpartuale ebenfalls hohe Falschpositivrate des CTG und eine möglicherweise damit verbundene erhöhte operative Entbindungsfrequenz kann durch den ergänzenden Einsatz von Fetalblutanalysen reduziert werden. Zusätzliche Methoden wie z. B. die ST-Strecken-Analyse verbessern die Spezifität des CTG und reduzieren die Notwendigkeit fetaler Skalpblutanalysen.

Ante- wie auch subpartual soll der Zustand des Feten durch Einsatz möglichst objektiver Bewertungskriterien beurteilt werden. Hierzu eignen sich insbesondere der FIGO-Score, der die Parameter des CTGs quantifiziert, und bereits in Entwicklung befindliche elektronische Verfahren, die das CTG „online“ analysieren. Grundsätzlich ist die Kenntnis von Physiologie und Pathophysiologie der fetalen Herz-Kreislauf-Regulation eine wesentliche Voraussetzung für eine adäquate Interpretation des fetalen Herzfrequenzmusters.

**Zitierweise:** National German Guideline (S1): Use of CTG During Pregnancy and Labour, AWMF Registry No. 015/036. Geburtsh Frauenheilk 2014; 74: 721–732

## 11 Literatur

- Agrawal SK, Doucette F, Gratton R et al. Intrapartum computerized fetal heart rate parameters and metabolic acidosis at birth. *Obstet Gynecol* 2003; 102: 731–738
- Alfirevic Z, Neilson JP. Biophysical profile for fetal assessment in high risk pregnancies. *Cochrane Database Syst Rev* 2008; 1: CD000038
- Alfirevic Z, Devane D, Gyte GM. Continuous cardiotocography (CTG) as a form of electronic foetal monitoring (EFM) for foetal assessment during labour. *Cochrane Database Syst Rev* 2006; 3: CD006066
- ACOG Practice Bulletin No. 106: Intrapartum fetal heart rate monitoring, nomenclature, interpretation, and general management principles. *Obstet Gynecol* 2009; 114: 192–202
- ACOG Practice Bulletin No. 116: Management of intrapartum fetal heart rate tracings. *Obstet Gynecol* 2010; 116: 1232–1240
- Ashkenazi S, Metzker A, Merlob P et al. Scalp changes after fetal monitoring. *Arch Dis Child* 1985; 60: 267–269
- Beckley S, Stenhouse E, Greene K. The development and evaluation of a computer-assisted teaching programme for intrapartum fetal monitoring. *BJOG* 2000; 107: 1138–1144
- Berger R, Bender S, Sefkow S et al. Peri/intraventricular haemorrhage: a cranial ultrasound study on 5286 neonates. *Eur J Obstet Gynecol Reprod Biol* 1997; 75: 191–203
- Bernardes J, Costa Pereira A, Ayres de Campos D et al. Evaluation of interobserver agreement of cardiotocograms. *Int J Gynaecol Obstet* 1997; 57: 33–37
- Bloom SL, Spong CY, Thom E et al. Fetal pulse oximetry and caesarean delivery. *New Engl J Med* 2006; 355: 195–202
- Brown VA, Sawers RS, Parsons RJ et al. The value of antenatal cardiotocography in the management of high risk pregnancy: a randomized controlled trial. *Br J Obstet Gynaecol* 1982; 89: 716–722
- Butterwegge M, Gonser M, Roemer VM. Stellungnahme zu einem Gutachten der BQS über geburtshilfliche Qualitätsindikatoren. *Z Geburtsh Neonatol* 2005; 209: 69–75
- Carbonne B, Langer B, Goffinet F et al. Clinical importance of fetal pulse oximetry. II. Comparative predictive values of oximetry and scalp pH. Multicenter study. *J Gynecol Obstet Biol Reprod (Paris)* 1999; 28: 137–144
- Cibilis LA. On intrapartum fetal monitoring. *Am J Obstet Gynecol* 1996; 174: 1382–1389
- Chow O, Larbig A, Kabartas B et al. Pitfalls of external FHR-monitoring in the second stage of labor. *J Mat Fet Neonat Med* 2010; 23 (Suppl.): 236
- Dawes GS, Moulden M, Redman CWG. Short term fetal heart rate variation, decelerations, and umbilical flow velocity waveforms before labour. *Obstet Gynecol* 1992; 80: 673–678
- Daumer M, Scholz M, Boulesteix AL et al. The normal fetal heart rate study: analysis plan. *Nature Proceedings* 2007; DOI: 10.1038/npre.980.1
- Devoe LD, Ross M, Wilde C et al. United States multicenter clinical usage study of the STAN 21 electronic fetal monitoring system. *Am J Obstet Gynecol* 2006; 195: 729–734
- DKG Leitfaden: Aufbewahrungsverpflichtungen und -fristen von Dokumenten im Krankenhaus. NKG Mitteilung 2006; 394
- Drogtrop AP, Ubels R, Nijhuis JG. The association between fetal body movements, eye movements, and heart rate patterns in pregnancies between 25 and 30 weeks of gestation. *Early Hum Dev* 1990; 23: 67–73
- Dudenhausen JW, Luhr C, Dimer JS. Umbilical artery blood gases in healthy term newborn infants. *Int J Gynaecol Obstet* 1997; 57: 251–258
- East CE, Colditz PB. Fetal pulse oximetry for fetal assessment in labour. *Cochrane Database Syst Rev* 2007; 2: CD004075
- Elliott C, Warrick PA, Graham E et al. Graded classification of fetal heart rate tracings: association with neonatal metabolic acidosis and neurologic morbidity. *Am J Obstet Gynecol* 2010; 202: 258.e1–258.e8
- Fedorkow DM, Stewart TJ, Parboosingh J. Fetal heart rate changes associated with general anesthesia. *Am J Perinatol* 1989; 6: 287–288
- Ferrazzi E, Rigano S, Bozzo M et al. Umbilical vein blood flow in growth-restricted fetuses. *Ultrasound Obstet Gynecol* 2000; 16: 432–438
- FDA. Dear Healthcare Provider Letter 3–09/04/2009. Online: <http://www.fda.gov/MedicalDevices/Safety/AlertsandNotices/ucm181503.htm>; Stand: 08/2013
- Flynn AM, Kelly J, Mansfield H et al. A randomized controlled trial of non-stress-antepartum cardiotocography. *Br J Obstet Gynaecol* 1982; 89: 427–433
- Gaffney G, Flavell V, Johnson A et al. Cerebral palsy and neonatal encephalopathy. *Arch Dis Child Fetal Neonat Ed* 1994; 70: F195–F200
- Gaffney G, Sellers S, Flavell V et al. A case-control study of intrapartum care, cerebral palsy, and perinatal death. *Br Med J* 1994; 308: 743–750
- Garcia J, Corry M, MacDonald D et al. Mothers' views of continuous electronic fetal heart monitoring and intermittent auscultation in a randomized controlled trial. *Birth* 1985; 12: 79–86
- Garite TJ, Dildy GA, McNamara H et al. A multicenter controlled trial of fetal pulse oximetry in the intrapartum management of nonreassuring fetal heart rate patterns. *Am J Obstet Gynecol* 2000; 183: 1049–1058
- Garnier Y, Coumans A, Berger R et al. Endotoxemia severely affects circulation during normoxia and asphyxia in immature fetal sheep. *J Soc Gynecol Invest* 2001; 8: 134–142

- 33 Gnirs J, Schelling M, Kolben M et al. Referenzkurven für das fetale Bewegungsprofil. *Geburtsh Frauenheilk* 1998; 58: 355–362
- 34 Gonser M, König M, Marzusch K. Schema zur CTG-Interpretation nach den FIGO-Richtlinien. *Gynäkol Prax* 1995; 19: 649–659
- 35 Graatsma EM, Jacod BC, van Egmond LAJ et al. Fetal electrocardiography: feasibility of long-term fetal heart rate recordings. *BJOG* 2009; 116: 334–337
- 36 Grant A, O'Brien N, Joy MT et al. Cerebral palsy among children born during the Dublin randomised trial of intrapartum monitoring. *Lancet* 1989; 8674: 1233–1236
- 37 Grivel RM, Alfrevic Z, Gyte GM et al. Antenatal cardiotocography for foetal assessment. *Cochrane Database Syst Rev* 2010; 1: CD007863
- 38 Hansen PK, Smith SF, Nim J et al. Maternal attitudes to fetal monitoring. *Eur J Obstet Gynecol Reprod Biol* 1985; 20: 43–51
- 39 Haverkamp AD, Thompson HE, McFee JG et al. The evaluation of continuous fetal heart rate monitoring in high-risk pregnancy. *Am J Obstet Gynecol* 1976; 125: 310–317
- 40 Haverkamp AD, Orleans M, Langendoerfer S et al. A controlled trial of the differential effects of intrapartum fetal monitoring. *Am J Obstet Gynecol* 1979; 134: 399–412
- 41 Herbst A, Ingemarsson I. Intermittent versus continuous electronic fetal monitoring in labour: a randomized study. *Br J Obstet Gynaecol* 1994; 101: 663–668
- 42 Hod M, Kerner R. Telemedicine for antenatal surveillance of high-risk pregnancies with ambulatory and home fetal heart monitoring—an update. *J Perinat Med* 2003; 31: 195–200
- 43 Impey L, Reynolds M, MacQuillan K et al. Admission cardiotocography: a randomised controlled trial. *Lancet* 2003; 361: 465–470
- 44 Jensen A, Martius G. Überwachung und Leitung der Entbindung. In: Martius G, Rath W, Hrsg. *Geburtshilfe und Perinatologie*. Stuttgart: Thieme; 1991: 386–442
- 45 Jensen A, Roman C, Rudolph AM. Effects of reducing uterine blood flow distribution and oxygen delivery. *J Dev Physiol* 1991; 15: 309–323
- 46 Keith RD, Beckley S, Garibaldi JM et al. A multicentre comparative study of 17 experts and an intelligent computer system for managing labour using the cardiotocogram. *Br J Obstet Gynaecol* 1995; 102: 688–700
- 47 Kelso AM, Parsons RJ, Lawrence GF et al. An assessment of continuous fetal heart rate monitoring in labor. *Am J Obstet Gynecol* 1978; 131: 526–532
- 48 Kidd L, Patel N, Smith R. Non-stress antenatal cardiotocography – a prospective randomized clinical trial. *Br J Obstet Gynaecol* 1985; 92: 1156–1159
- 49 Killien MG, Shy K. A randomized trial of electronic fetal monitoring in preterm labor: mother's views. *Birth* 1989; 16: 7–12
- 50 Kühnert M, Schmidt S. Intrapartum management of nonreassuring fetal heart rate patterns: a randomized controlled trial of fetal pulse oximetry. *Am J Obstet Gynecol* 2004; 191: 1989–1995
- 51 Kühnert M, Hellmeyer L, Stein W et al. Twenty-four-hour CTG monitoring: comparison of normal pregnancies of 25–30 weeks of gestation versus 36–42 weeks of gestation. *Arch Gynecol Obstet* 2007; 275: 451–460
- 52 Langendoerfer S, Haverkamp AD, Murphy J et al. Pediatric follow up of a randomised controlled trial of intrapartum fetal monitoring techniques. *J Ped* 1980; 97: 103–107
- 53 Leveno KJ, Cunningham FG, Nelson S et al. A prospective comparison of selective and universal electronic fetal monitoring in 34,995 pregnancies. *N Engl J Med* 1986; 315: 615–619
- 54 Liston R, Sawchuck D, Young D. Fetal health surveillance: antepartum and intrapartum consensus guideline. *J Obstet Gynecol Canada* 2007; 29 (Suppl. 4): 3–56
- 55 Lotgering FK, Wallenburg HC, Schouten HJ. Interobserver and intraobserver variation in the assessment of antepartum cardiotocograms. *Am J Obstet Gynecol* 1982; 144: 701–705
- 56 Lumley J, Lester A, Anderson I et al. A randomized trial of weekly cardiotocography in high-risk obstetric patients. *Br J Obstet Gynaecol* 1983; 90: 1018–1026
- 57 Luthy DA, Shy KK, van Belle G. A randomized trial of electronic fetal heart monitoring in premature labor. *Obstet Gynecol* 1987; 69: 687–695
- 58 MacDonald D, Grant A, Sheridan-Perreira M. The Dublin randomized controlled trial of intrapartum fetal heart rate monitoring. *Am J Obstet Gynecol* 1985; 152: 524–539
- 59 Maeda K. FIGO News: Report of the FIGO Study Group on the Assessment of New Technology. Evaluation and standardization of fetal monitoring. *Int J Gynaecol Obstet* 1997; 59: 169–173
- 60 Mahomed K, Nyoni R, Mulambo T et al. Randomised controlled trial of intrapartum fetal heart rate monitoring. *Br Med J* 1994; 308: 497–500
- 61 Macones GA, Hankins GD, Spong CY et al. The 2008 National Institute of Child Health and Human Development workshop report on electronic fetal monitoring: update on definitions, interpretation and research guidelines. *Obstet Gynecol* 2008; 112: 661–666
- 62 Mardirosoff C, Dumont L, Boulvain M et al. Fetal bradycardia due to intrathecal opioids for labour analgesia: a systematic review. *BJOG* 2002; 109: 274–281
- 63 Miller DA, Rabello YA, Paul RH. The modified biophysical profile: antepartum testing in the 1990s. *Am J Obstet Gynecol* 1996; 174: 812–817
- 64 Morgenstern J, Abels T, Somville T et al. Accuracy of fetal heart rate monitoring. *Gynäkologe* 1994; 27: 123–129
- 65 Murray ML, Higgins P. Computer versus lecture: strategies for teaching fetal monitoring. *J Perinatol* 1996; 16: 15–19
- 66 National Health and Medical Research Council. How to review the Evidence: systematic Identification and Review of the scientific Literature. Canberra: Biotext; 1999
- 67 Neilson JP. Fetal electrocardiogram (ECG) for fetal monitoring during labour. *Cochrane Database Syst Rev* 2012; 4: CD000116
- 68 Neilson DR jr., Freeman RK, Mangan S. Signal ambiguity resulting in unexpected outcome with external fetal heart rate monitoring. *Am J Obstet Gynecol* 2008; 199: 717–724
- 69 Neldam S, Osler M, Hansen PK et al. Monitoring labor with cardiotocography and stethoscopic examination in normal and risk deliveries. *Ugeskr Laeger* 1985; 147: 2901–2907
- 70 Neldam S, Osler M, Hansen PK et al. Intrapartum fetal heart rate monitoring in a combined low- and high-risk population: a controlled clinical trial. *Eur J Obstet Gynecol Reprod Biol* 1986; 23: 1–11
- 71 Nelson KB, Dambrosia JM, Ting TY et al. Uncertain value of electronic fetal monitoring in predicting cerebral palsy. *N Engl J Med* 1996; 334: 613–618
- 72 NICHD (National Institute of Child Health and Human Development). Electronic fetal heart rate monitoring: Research guidelines for interpretation. Research Planning Workshop. *Am J Obstet Gynecol* 1997; 177: 1385–1390
- 73 Nijhuis JG, van de Pas M. Behavioral states and their ontogeny: human studies. *Semin Perinatol* 1992; 16: 206–210
- 74 Noren H, Blad S, Carlsson A et al. STAN in clinical practice – The outcome of 2 years of regular use in the city of Gothenburg. *Am J Obstet Gynecol* 2006; 195: 7–15
- 75 OLG Oldenburg 15.5.90 5 U 114/89; OLG Karlsruhe 28.11.97 U 28/79; OLG Hamburg 30.03.79 1 U 115/77; BGH NJW 1992, 1560–VersR 1992: 745
- 76 Parer JT, King TL. Fetal heart rate monitoring: the next step? *Am J Obstet Gynecol* 2010; 202: 520–521
- 77 Pattison N, McCowan L. Cardiotocography for antepartum fetal assessment (Cochrane Review). *Cochrane Database Syst Rev* 2010; 1: CD001068
- 78 Petrie RH, Yeh SY, Murata Y et al. The effects of drugs on fetal heart rate variability. *Am J Obstet Gynecol* 1987; 130: 294–299
- 79 Renou P, Chang A, Anderson I. Controlled trial of fetal intensive care. *Am J Obstet Gynecol* 1976; 126: 470–476
- 80 Roemer VM. Quantitative CTG-Bewertung sub partu mit einem neuen CTG-Score: Wie gut sind die Korrelationen mit den Parametern des fetalen Säure-Basen-Haushaltes im Nabelschnurblut? *Z Geburtshilfe Neonatol* 2003; 207: 121–126
- 81 Rooth G. *Perinatal Acid-base Balance*. Lund: Studentlitteratur; 1988
- 82 Rooth G, Huch A, Huch R. FIGO News: Guidelines for the use of fetal monitoring. *Int J Gynaecol Obstet* 1987; 25: 159–167
- 83 Rosen KG. Fetal electrocardiogram waveform analysis in labour. *Curr Opin Obstet Gynecol* 2005; 17: 147–150
- 84 Royal College of Obstetricians and Gynaecologists. *Intrapartum care*. London/UK, Sept. 2007
- 85 Rüttgers H. *Kardiotokographie. Standards in der Perinatalmedizin*. *Perinat Med* 1989; 1: 9–14
- 86 Samueloff A, Langer O, Berkus M et al. Is fetal heart rate variability a good predictor of fetal outcome? *Acta Obstet Gynecol Scand* 1994; 73: 39–44
- 87 Saling E. *Das Kind im Bereich der Geburtshilfe*. Stuttgart: Thieme; 1966
- 88 Schiermeier S, Westhof G, Daumer M et al. Die Kurzzeitvariation der fetalen Herzfrequenz und der FIGO-CTG-Score. Erste Erfahrungen in der Kombination dieser Überwachungsparameter. *Geburtsh Frauenheilk* 2006; 66: 752–755



- 89 Schindler T. Delayed Moving Window Algorithm for Online Cardiogram Analysis – a Comparison of computerized CTG Analysis. 1st ed. Aachen: Verlag Mainz; 2002
- 90 Schneider KTM. Die Überwachung der Geburt aus forensischer Sicht. Gynäkologie 1994; 27: 212–221
- 91 Schneider KTM, Bung P, Weber S et al. An orthostatic uterovascular syndrome – a prospective, longitudinal study. Am J Obstet Gynecol 1993; 169: 183–189
- 92 Shy KK, Luthy DA, Bennett FC et al. Effects of electronic fetal heart rate monitoring, as compared with periodic auscultation, on neurologic development of premature infants. N Engl J Med 1990; 322: 588–593
- 93 Spencer JA, Badawi N, Burton P et al. The intrapartum CTG prior to neonatal encephalopathy at term: a case-control study. Br J Obstet Gynaecol 1997; 104: 25–28
- 94 Staisch KJ, Westlake JR, Bashore RA. Blind oxytocin challenge test and perinatal outcome. Am J Obstet Gynecol 1980; 138: 399–403
- 95 Street P, Dawes GS, Moulden M et al. Short term variation in abnormal antenatal fetal heart rate records. Am J Obstet Gynecol 1991; 165: 515–523
- 96 Tan KH, Smyth R. Fetal vibroacoustic stimulation for facilitation of tests of fetal wellbeing (Cochrane Review). Cochrane Database Syst Rev 2013; 12: CD002963
- 97 Thacker SB, Berkelman RL. Assessing the diagnostic accuracy and efficacy of selected antepartum fetal surveillance techniques. Obstet Gynecol Surv 1986; 41: 121–141
- 98 Thacker SB, Stroup D, Chang M. Continuous electronic heart rate monitoring for fetal assessment during labor (Cochrane Review). Cochrane Database Syst Rev 2013; 5: CD006066
- 99 Trimbos JB, Keirse MJ. Observer variability in assessment of antepartum cardiograms. Br J Obstet Gynaecol 1978; 85: 900–906
- 100 Van Geijn HP, Jongma HW, Doesburg WH et al. The effect of diazepam administration during pregnancy or labor on the heart rate variability of the newborn infant. Eur J Obstet Gynecol Reprod Biol 1980; 10: 187–201
- 101 Van Woerden EE, van Geijn HP. Factors influencing the fetal Heart Rate. In: van Geijn HP, Copray FJA, eds. A critical Appraisal of fetal Surveillance. Amsterdam: Excerpta Medica; 1994: 211–220
- 102 Vintzileos AM, Antsaklis A, Varvarigos I et al. A randomized trial of intrapartum electronic fetal heart rate monitoring versus intermittent auscultation. Obstet Gynecol 1993; 81: 899–907
- 103 Vintzileos AM, Nochimson DJ, Antsaklis A et al. Comparison of intrapartum electronic fetal heart rate monitoring versus intermittent auscultation in detecting fetal acidemia at birth. Am J Obstet Gynecol 1995; 173: 1021–1024
- 104 Vintzileos AM, Nochimson DJ, Guzman ER et al. Intrapartum electronic fetal heart rate monitoring versus intermittent auscultation: a meta-analysis. Obstet Gynecol 1995; 85: 149–155
- 105 Visser GH, Dawes GS, Redman CW. Numerical analysis of the normal human antenatal fetal heart rate. Br J Obstet Gynaecol 1981; 88: 792–802
- 106 Voigt M, Schneider KT, Jahrig K. Analyse des Geburtsgutes des Jahrgangs 1992 der Bundesrepublik Deutschland. Teil 1: Neue Perzentilwerte für die Körpermaße von Neugeborenen. Geburtsh Frauenheilk 1996; 56: 550–558
- 107 Westergaard HB, Langhoff-Roos J, Lingman G et al. A critical appraisal in high-risk pregnancies: use of meta-analysis in evidence-based obstetrics. Ultrasound Obstet Gynecol 2001; 17: 466–476
- 108 Westerhuis ME, Moons KG, van Beek E et al. A randomised clinical trial on cardiotocography plus fetal blood sampling versus cardiotocography plus ST-analysis of the fetal electrocardiogram (STAN(R)) for intrapartum monitoring. BMC Pregnancy Childbirth 2007; 26: 13
- 109 Wood C, Renou P, Oats J et al. A controlled trial of fetal heart rate monitoring in a low-risk obstetric population. Am J Obstet Gynecol 1981; 141: 527–534
- 110 The Society of Obstetricians and Gynaecologists of Canada. Clinical Practice Guideline Fetal Health Surveillance: Antepartum and Intrapartum Consensus Guideline No. 197 (Replaces No. 90 and No. 112), Ottawa/Kanada: SOGC; September 2007
- 111 Young DC, Gray JH, Luther ER et al. Fetal scalp blood sampling: its value in an active obstetric unit. Am J Obstet Gynecol 1980; 136: 276–281
- 112 Zalar RW jr., Quilligan EJ. The influence of scalp sampling on the cesarean section rate for fetal distress. Am J Obstet Gynecol 1979; 135: 239–246

|                                                                         |                                                                                                                                                                                                                                                                                                                                                                                                                                                                                                                            |
|-------------------------------------------------------------------------|----------------------------------------------------------------------------------------------------------------------------------------------------------------------------------------------------------------------------------------------------------------------------------------------------------------------------------------------------------------------------------------------------------------------------------------------------------------------------------------------------------------------------|
| Erstfassung                                                             | 2005                                                                                                                                                                                                                                                                                                                                                                                                                                                                                                                       |
| Überarbeitung                                                           | 2008, 2012, 2013                                                                                                                                                                                                                                                                                                                                                                                                                                                                                                           |
| beteiligte Fachgesellschaften, Arbeitsgemeinschaften und Organisationen | Deutsche Gesellschaft für Gynäkologie und Geburtshilfe<br>▶ Arbeitsgemeinschaft Materno-fetale Medizin<br>▶ Board für Pränatal- und Geburtsmedizin<br>▶ Arbeitsgemeinschaft Medizinrecht in Gynäkologie und Geburtshilfe<br>▶ Deutsche Gesellschaft für Perinatale Medizin<br>▶ Deutsche Gesellschaft für Pränatal und Geburtsmedizin                                                                                                                                                                                      |
| Autoren der letzten Überarbeitung                                       | Prof. Dr. med. K. T. M. Schneider, München (Federführung)<br>Prof. Dr. med. M. Butterwegge, Bremen<br>Dr. rer. nat. M. Daumer, München<br>Prof. Dr. med. J. Dudenhausen, Berlin<br>PD Dr. med. M. Gonser, Wiesbaden<br>Prof. Dr. med. P. Husslein, Wien<br>Prof. Dr. med. K. Hecher, Hamburg<br>Prof. Dr. med. A. Jensen, Bochum<br>Prof. Dr. med. W. Rath, Aachen<br>PD Dr. med. S. Schiermeier, Witten<br>Prof. Dr. med. S. Schmidt, Marburg<br>Prof. Dr. med. K. Vetter, Berlin<br>Prof. Dr. med. R. Zimmermann, Zürich |

Die Gültigkeit der Leitlinie wurde durch den Vorstand der DGGG und die DGGG-Leitlinienkommission im September 2013 bestätigt. Die Gültigkeitsdauer der Leitlinie geht bis 31.08.2017

**Erstellungsdatum:** 07/2004

**Überarbeitung von:** 08/2013

**Nächste Überprüfung geplant:** 08/2017

Die „Leitlinien“ der Wissenschaftlichen Medizinischen Fachgesellschaften sind systematisch entwickelte Hilfen für Ärzte zur Entscheidungsfindung in spezifischen Situationen. Sie beruhen auf aktuellen wissenschaftlichen Erkenntnissen und in der Praxis bewährten Verfahren und sorgen für mehr Sicherheit in der Medizin, sollen aber auch ökonomische Aspekte berücksichtigen. Die „Leitlinien“ sind für Ärzte rechtlich nicht bindend und haben daher weder haftungsbegründende noch haftungsbefreiende Wirkung. Die AWMF erfasst und publiziert die Leitlinien der Fachgesellschaften mit größtmöglicher Sorgfalt – dennoch kann die AWMF für die Richtigkeit des Inhalts keine Verantwortung übernehmen.

**Insbesondere bei Dosierungsangaben sind stets die Angaben der Hersteller zu beachten!**

© Deutsche Gesellschaft für Gynäkologie und Geburtshilfe

**Autorisiert für elektronische Publikation: AWMF online**
